# Supplementary material for: Rapid authenticity testing of artificially bred green turtles (Chelonia mydas) using microsatellite and mitochondrial DNA markers
Source: PeerJ. 2021 Oct 28;9:e12410. doi: 10.7717/peerj.12410 (PMC8557680; doi:10.7717/peerj.12410)
Supplement: Supplemental Information 8 [file peerj-09-12410-s008.xls]

## Sheet: Sheet1
Sample File	Marker	Dye	Size 1	Size 2	Height 1	Height 2	Peak Area 1	Peak Area 2	Data Point 1	Data Point 2
A01.fsa	FAM	B	226.07	230.26	921	841	5531	5077	3630	3680
D01.fsa	FAM	B	225.9	230.19	5469	4678	34313	29319	3610	3661
A02.fsa	FAM	B	218.63	225.86	905	668	5555	3926	3504	3590
D02.fsa	FAM	B	218.45	225.73	4435	3701	25333	21796	3449	3534
A03.fsa	FAM	B	225.82	238.43	1246	941	7359	5837	3550	3700
D03.fsa	FAM	B	225.77	238.32	6159	4908	35843	29869	3543	3691
A04.fsa	FAM	B	217.3	225.77	923	767	5595	4663	3461	3561
D04.fsa	FAM	B	217.3	225.69	6558	5558	37531	32146	3378	3475
A05.fsa	FAM	B	242.56	246.75	852	758	5188	4532	3729	3779
D05.fsa	FAM	B	242.37	246.48	3933	3365	23765	20794	3713	3762
A06.fsa	FAM	B	225.78		2082		12452		3591
D06.fsa	FAM	B	225.61		11255		66905		3490
A07.fsa	FAM	B	225.86	230.07	808	701	5050	4497	3559	3609
D07.fsa	FAM	B	225.77	230.06	7743	6478	46361	38626	3501	3551
A08.fsa	FAM	B	217.42	254.64	531	278	3226	1746	3473	3925
D08.fsa	FAM	B	217.24	254.53	6088	3158	36058	19328	3406	3849
A09.fsa	FAM	B	221.68	238.55	889	645	5487	4097	3526	3727
D09.fsa	FAM	B	221.59	238.41	5540	4015	33166	24867	3484	3682
A10.fsa	FAM	B	230.23	238.58	513	470	3184	2927	3629	3729
D10.fsa	FAM	B	229.98	238.34	6876	5794	41171	35550	3568	3667
A11.fsa	FAM	B	213.27	225.89	1442	1182	8890	7543	3529	3681
D11.fsa	FAM	B	213.15	225.81	6999	5779	41925	35998	3417	3566
A12.fsa	FAM	B	221.8		1096		6800		3643
D12.fsa	FAM	B	221.7		7682		47039		3527
B01.fsa	FAM	B	230.13	238.48	1109	873	6990	5633	3663	3763
E01.fsa	FAM	B	230.15	238.52	3944	3358	42696	36981	3729	3831
B02.fsa	FAM	B	217.45	225.78	594	456	3576	2673	3466	3564
E02.fsa	FAM	B	217.3	225.73	6376	5708	37264	33910	3468	3567
B03.fsa	FAM	B	221.55		378		2417		3504
E03.fsa	FAM	B	221.56		11874		69646		3513
B04.fsa	FAM	B	221.57	254.49	551	293	3373	1777	3482	3879
E04.fsa	FAM	B	221.5	254.47	5492	3065	32165	18758	3458	3850
B05.fsa	FAM	B	208.93	238.34	1781	1034	10323	6104	3325	3670
E05.fsa	FAM	B	208.84	238.26	5813	3479	34445	21642	3339	3684
B06.fsa	FAM	B	234.19	238.33	739	330	4464	2089	3614	3663
E06.fsa	FAM	B	234.07	238.3	6321	3395	38463	21231	3602	3652
B07.fsa	FAM	B	230.04	238.41	697	657	4262	4017	3569	3668
E07.fsa	FAM	B	229.91	238.32	5439	4602	33299	28421	3611	3711
B08.fsa	FAM	B	234.15		501		3303		3664
E08.fsa	FAM	B	234.13		7051		43265		3606
B09.fsa	FAM	B	229.95	234.15	544	467	3410	2942	3599	3649
E09.fsa	FAM	B	230.01	234.15	7456	6451	44990	39467	3599	3648
B10.fsa	FAM	B	238.36	250.75	407	336	2613	2191	3711	3861
E10.fsa	FAM	B	238.32	250.76	5351	4228	33030	26105	3672	3821
B11.fsa	FAM	B	221.61		237		1700		3518
E11.fsa	FAM	B	221.63	234.26	5115	4293	31808	26600	3531	3681
B12.fsa	FAM	B	234.41	238.63	745	383	4936	2502	3727	3778
E12.fsa	FAM	B	234.29	238.55	6865	4061	42737	26377	3696	3747
C01.fsa	FAM	B	221.62		726		4646		3544
F01.fsa	FAM	B	221.71		13272		81264		3603
C02.fsa	FAM	B	234.16	238.37	374	290	2236	1754	3660	3710
F02.fsa	FAM	B	234.23	238.36	4226	3527	25243	21188	3672	3721
C03.fsa	FAM	B	217.36	246.67	718	388	4285	2440	3455	3803
F03.fsa	FAM	B	217.39	246.69	4910	2837	29256	17774	3464	3813
C04.fsa	FAM	B	217.34	229.89	398	273	2319	1692	3391	3537
F04.fsa	FAM	B	217.27	229.95	5610	4719	32576	27690	3429	3577
C05.fsa	FAM	B	225.77		1364		8135		3523
F05.fsa	FAM	B	225.73		13205		79413		3510
C06.fsa	FAM	B	229.88		454		2723		3616
F06.fsa	FAM	B	229.89		7430		44080		3577
C07.fsa	FAM	B	231.04	242.45	512	357	3128	2467	3583	3718
F07.fsa	FAM	B	231.05	242.37	4996	3991	30422	25440	3580	3714
C08.fsa	FAM	B
F08.fsa	FAM	B	229.86		7525		45563		3607
C09.fsa	FAM	B	217.33	242.48	561	312	3363	1949	3437	3734
F09.fsa	FAM	B	217.3	242.45	7825	4725	46099	29322	3422	3718
C10.fsa	FAM	B	225.77	242.53	906	624	5623	3948	3558	3758
F10.fsa	FAM	B	225.82	242.61	7190	5001	42765	31194	3513	3711
C11.fsa	FAM	B	225.86		959		5941		3602
F11.fsa	FAM	B	225.81		15511		94575		3578
A01.fsa	TAMRA	Y	167.71	173.55	747	1886	4817	11801	2924	2996
A02.fsa	TAMRA	Y	161.23	164.09	1334	1249	8149	7607	2808	2843
A03.fsa	TAMRA	Y	161.24	164.12	2335	1184	13921	6791	2774	2809
A04.fsa	TAMRA	Y	167.73		1499		10043		2864
A05.fsa	TAMRA	Y	163.98	173.57	1543	1842	9717	11203	2792	2908
A06.fsa	TAMRA	Y	161.23		3606		21982		2810
A07.fsa	TAMRA	Y	161.23	166.9	1396	1402	8635	8611	2781	2850
A08.fsa	TAMRA	Y	161.23		1790		11334		2792
A09.fsa	TAMRA	Y	164.1	166.81	1554	834	9203	4844	2831	2864
A10.fsa	TAMRA	Y	164.09		2153		13576		2831
A11.fsa	TAMRA	Y	161.29	167.7	2384	969	15031	6203	2886	2966
A12.fsa	TAMRA	Y	164.25	173.6	2232	2274	14169	14376	2934	3051
B01.fsa	TAMRA	Y	164.08	173.52	2268	2242	14624	14614	2865	2981
B02.fsa	TAMRA	Y	167.59	173.52	371	1049	2464	6491	2868	2940
B03.fsa	TAMRA	Y	161.16		1381		8591		2778
B04.fsa	TAMRA	Y	167.78	173.4	536	934	3330	5881	2840	2908
B05.fsa	TAMRA	Y	161.25	164.07	2377	2396	14239	14361	2752	2786
B06.fsa	TAMRA	Y	161.16	173.5	1403	1502	8716	9395	2745	2894
B07.fsa	TAMRA	Y	167.63	173.5	558	1453	3412	9282	2827	2898
B08.fsa	TAMRA	Y	163.94	173.51	1141	1275	7048	7967	2819	2936
B09.fsa	TAMRA	Y	161.24	164.04	1048	977	6379	6139	2775	2809
B10.fsa	TAMRA	Y	164.03	166.9	981	551	6277	3444	2818	2853
B11.fsa	TAMRA	Y	155.51	176.39	385	509	2753	3395	2722	2976
B12.fsa	TAMRA	Y	166.91		1998		13019		2910
C01.fsa	TAMRA	Y	161.23		1595		10727		2815
C02.fsa	TAMRA	Y	163.97	167.6	883	417	5171	2651	2823	2867
C03.fsa	TAMRA	Y	164.05	173.52	1075	1107	6928	6909	2815	2930
C04.fsa	TAMRA	Y	173.48		666		4027		2873
C05.fsa	TAMRA	Y	166.88	173.5	584	1107	3691	7034	2822	2902
C06.fsa	TAMRA	Y	161.15	176.29	970	992	6168	6296	2787	2972
C07.fsa	TAMRA	Y	173.5		1765		11305		2900
C08.fsa	TAMRA	Y	161.08	176.26	397	485	2426	3247	2754	2937
C09.fsa	TAMRA	Y	161.16	164.04	1150	1120	6368	6476	2763	2798
C10.fsa	TAMRA	Y	173.5		3595		22068		2932
C11.fsa	TAMRA	Y	164.09	173.55	1019	1128	6691	7497	2856	2972
D01.fsa	TAMRA	Y	167.67	173.54	953	1975	6289	13924	2908	2980
D02.fsa	TAMRA	Y	161.16	163.98	2988	2853	18026	17268	2767	2801
D03.fsa	TAMRA	Y	161.16	163.97	3566	2617	20921	15284	2773	2807
D04.fsa	TAMRA	Y	167.73		4546		30612		2794
D05.fsa	TAMRA	Y	163.92	173.41	2461	2500	15231	15416	2783	2897
D06.fsa	TAMRA	Y	161.09		5663		34116		2728
D07.fsa	TAMRA	Y	161.17	166.86	3273	2971	20252	18433	2737	2805
D08.fsa	TAMRA	Y	161.17		6932		42081		2740
D09.fsa	TAMRA	Y	164.07	166.8	3484	1952	20010	10917	2798	2831
D10.fsa	TAMRA	Y	164.06		5966		37228		2782
D11.fsa	TAMRA	Y	161.24	167.65	5066	2348	31868	14982	2790	2868
D12.fsa	TAMRA	Y	164.09	173.5	3432	3312	21294	20745	2834	2949
E01.fsa	TAMRA	Y	164.01	173.48	2184	1886	19840	18199	2919	3037
E02.fsa	TAMRA	Y	167.57	173.4	1214	2618	7995	16654	2872	2943
E03.fsa	TAMRA	Y	161.16		3681		23013		2792
E04.fsa	TAMRA	Y	167.77	173.44	2026	2407	12172	14692	2824	2892
E05.fsa	TAMRA	Y	161.16	164.06	2836	2636	16814	15965	2765	2800
E06.fsa	TAMRA	Y	161.17	173.49	2540	2198	15751	14228	2738	2886
E07.fsa	TAMRA	Y	167.66	173.5	1412	2860	8875	17608	2866	2937
E08.fsa	TAMRA	Y	163.91	173.37	2835	2743	17361	17013	2775	2889
E09.fsa	TAMRA	Y	161.16	163.96	2476	2126	15062	12747	2776	2810
E10.fsa	TAMRA	Y	163.97	166.86	2910	2104	17489	12885	2788	2823
E11.fsa	TAMRA	Y	155.54	176.37	3037	2580	19368	16323	2734	2988
E12.fsa	TAMRA	Y	166.86		7682		51017		2884
F01.fsa	TAMRA	Y	161.22		4665		30545		2867
F02.fsa	TAMRA	Y	164.04	167.67	3060	1450	17978	8677	2834	2878
F03.fsa	TAMRA	Y	164.03	173.47	1744	1779	11131	11224	2822	2937
F04.fsa	TAMRA	Y	167.64	173.44	763	1498	4655	9360	2838	2908
F05.fsa	TAMRA	Y	166.82	173.47	1304	1871	8160	11560	2811	2891
F06.fsa	TAMRA	Y	161.25	176.4	1901	1658	11868	10452	2759	2942
F07.fsa	TAMRA	Y	173.44		3942		24660		2898
F08.fsa	TAMRA	Y	161.15	176.37	1588	1368	10278	8876	2783	2968
F09.fsa	TAMRA	Y	161.16	164.07	2657	2465	16034	15332	2751	2786
F10.fsa	TAMRA	Y	173.52		5717		36359		2893
F11.fsa	TAMRA	Y	164.01	173.5	2711	2587	17373	16378	2835	2951
